# Supplementary material
Source: publisher figshare collection journal article supplement (https://rs.figshare.com/ndownloader/files/22679630)
Supplement: Supplementary file 1 [file 22679630]

Table S2

**Table S2.** 25 hypothetical diet vectors consisting of the relative proportions of each resource item expressed in percentages. The primary resource for each hypothetical diet, if there is one, is bolded.

| Hypothetical diet | actino | crypto | cyano | diatom | dino | eugleno | golden | green | MOB | tPOM | tPOMb |
| --- | --- | --- | --- | --- | --- | --- | --- | --- | --- | --- | --- |
| H1 | 0 | **60** | 0 | 10 | 10 | 0 | 0 | 10 | 0 | 0 | 10 |
| H2 | 0 | **60** | 10 | 0 | 10 | 0 | 10 | 0 | 0 | 10 | 0 |
| H3 | 0 | 10 | 0 | **60** | 0 | 0 | 10 | 10 | 0 | 10 | 0 |
| H4 | 0 | 10 | 0 | 0 | **60** | 0 | 10 | 10 | 0 | 10 | 0 |
| H5 | 0 | 10 | 10 | 0 | 0 | 0 | **60** | 10 | 0 | 10 | 0 |
| H6 | 0 | 10 | 0 | 0 | 0 | **60** | 10 | 10 | 0 | 10 | 0 |
| H7 | 0 | 10 | 10 | 0 | 0 | 0 | 10 | **60** | 0 | 10 | 0 |
| H8 | **60** | 10 | 0 | 0 | 0 | 0 | 10 | 10 | 0 | 10 | 0 |
| H9 | 0 | 10 | **60** | 0 | 0 | 0 | 10 | 10 | 0 | 10 | 0 |
| H10 | 0 | 10 | 0 | 0 | 0 | 0 | 10 | 10 | **60** | 10 | 0 |
| H11 | 0 | 10 | 0 | 0 | 0 | 0 | 10 | 10 | 0 | 10 | **60** |
| H12 | 0 | 10 | 10 | 0 | 0 | 0 | 10 | 10 | 0 | **60** | 0 |
| H13 | 0 | 25 | 0 | 25 | 25 | 0 | 25 | 0 | 0 | 0 | 0 |
| H14 | 0 | 25 | 25 | 0 | 0 | 0 | 25 | 25 | 0 | 0 | 0 |
| H15 | 0 | 25 | 0 | 25 | 0 | 0 | 0 | 0 | 0 | 25 | 25 |
| H16 | 0 | 0 | 25 | 0 | 0 | 0 | 0 | 25 | 0 | 25 | 25 |
| H17 | 20 | **70** | 0 | 0 | 0 | 0 | 0 | 0 | 0 | 0 | 10 |
| H18 | 20 | 0 | 0 | **70** | 0 | 0 | 0 | 0 | 0 | 0 | 10 |
| H19 | 10 | 10 | 10 | 10 | 10 | 0 | 10 | 10 | 10 | 10 | 10 |
| H20 | 10 | 20 | 10 | 20 | 0 | 0 | 10 | 0 | 10 | 10 | 10 |
| H21 | 0 | 10 | 0 | 0 | 0 | 0 | 10 | **80** | 0 | 0 | 0 |
| H22 | 0 | 10 | 0 | **80** | 0 | 0 | 10 | 0 | 0 | 0 | 0 |
| H23 | 0 | **80** | 10 | 0 | 0 | 0 | 0 | 10 | 0 | 0 | 0 |
| H24 | 0 | 0 | 10 | **80** | 0 | 0 | 10 | 0 | 0 | 0 | 0 |
| H25 | 0 | 0 | 0 | **80** | 0 | 0 | 10 | 10 | 0 | 0 | 0 |
